# Supplementary material for: Effect of UV Irradiation on the Structural Variation of Metal Oxide-Silica Nanocomposites for Enhanced Removal of Erythromycin at Neutral pH
Source: MDPI journal article supplement (doi:10.3390/catal12040424), 2022-04-10
Supplement: s1 [file s1]

## Effect of UV irradiation on the Structural Variation of Metal Oxide-Silica Nanocomposites for Enhanced Removal of Erythromycin at Neutral pH

Yasaman Ghaffari<sup>a,b</sup>, Soyoung Beak<sup>b</sup>, Jiyeol Bae<sup>a,b</sup>, Md Saifuddin<sup>c</sup>, Kwang Soo Kim<sup>a,b,\*</sup>

*a. University of Science and Technology (UST), Daejeon, Republic of Korea*

*b. Department of Environmental Research, Korea Institute of Civil Engineering and Building Technology (KICT), Goyang, Republic of Korea*

*c. Department of Environment Engineering, Inha University, Incheon 22212, Republic of Korea*

ERY degradation kinetics can be calculated by the pseudo-first-order kinetic model ( $\ln(C_0/C_t) = k_{app}t$ ), where  $C_0$  and  $C_t$  are the ERY concentration at  $t = 0$  and  $t$ , respectively. The  $K_{app}$  is the apparent rate constant ( $\text{min}^{-1}$ ). The  $\ln(C_0/C_t)$  versus  $t$  plots for heterogeneous photo-Fenton systems have been shown in Supplementary Figure 1a. The kinetic parameters ( $K_{app}$ ), and linear regression value ( $R^2$ ) were estimated 1.13  $\text{min}^{-1}$  and 0.98, respectively.

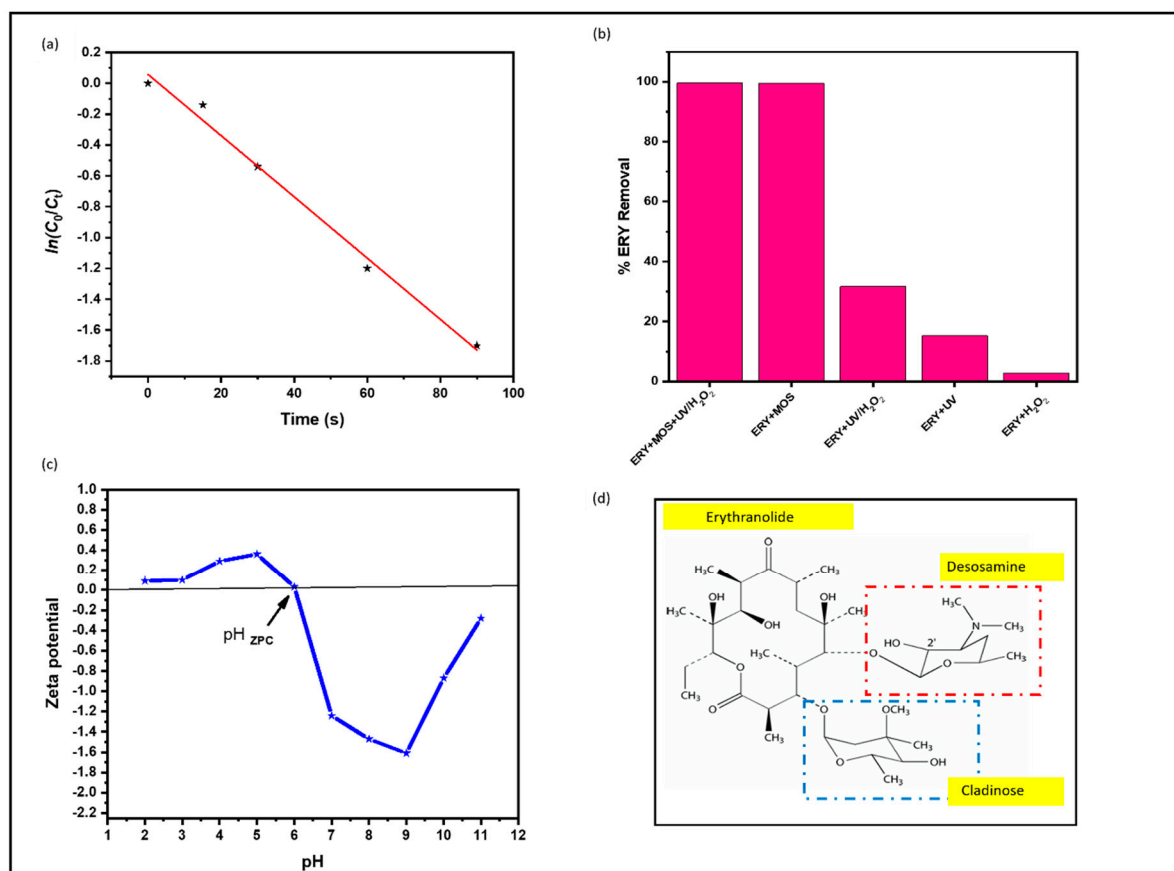

**Figure S1. (a) Degradation kinetic modeling of ERY under UV/H<sub>2</sub>O<sub>2</sub>/MOS system, (b) Removal of ERY using pristine nanocomposite, (c) Zeta potential of MOS, (d) Chemical structure of ERY**

### Possible mechanisms for degradation of ERY:

**Scavenger studies:** To identify the main active species responsible for ERY degradation, the radical scavenging test was performed using EDTA as quenching agent for the holes ( $h^+$ ), K<sub>2</sub>Cr<sub>2</sub>O<sub>7</sub> for the electrons ( $e^-$ ), p-benzoquinone for superoxides ( $\cdot O_2^-$ ), tert-butanol for hydroxyl radical ( $\cdot OH$ ), and, KI for surface-bound  $\cdot OH$  ( $\cdot OH_{surf}$ ). The experiments were performed at the same conditions as mentioned in the main manuscript, but 2 mg L<sup>-1</sup> of scavengers were added to the solution in this experiment. The results have been shown in Supplementary Figure 2. As shown in the figure, only 15.8% and 18.53 % of ERY were removed after adding

of KI and tert-butanol to the solution, but more than 70% ERY degradation was observed in the presence of other scavengers. These results indicate that both  $\cdot\text{OH}$  radicals and ( $\cdot\text{OH}_{\text{surf}}$ ) played an essential role in the degradation and other scavengers had a less important role. All the possible reactions involved in degradation are as follows:

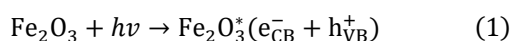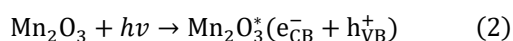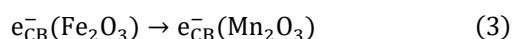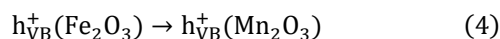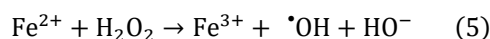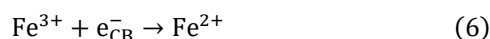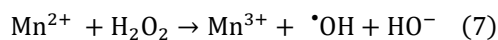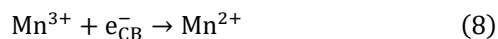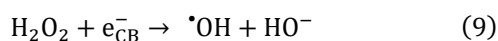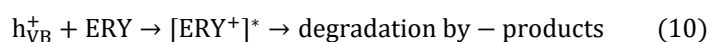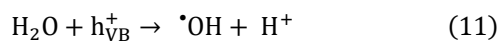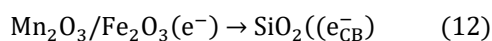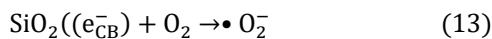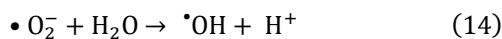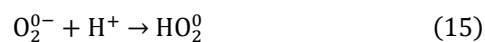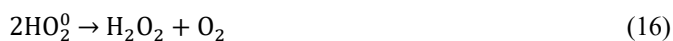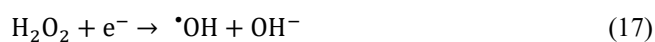

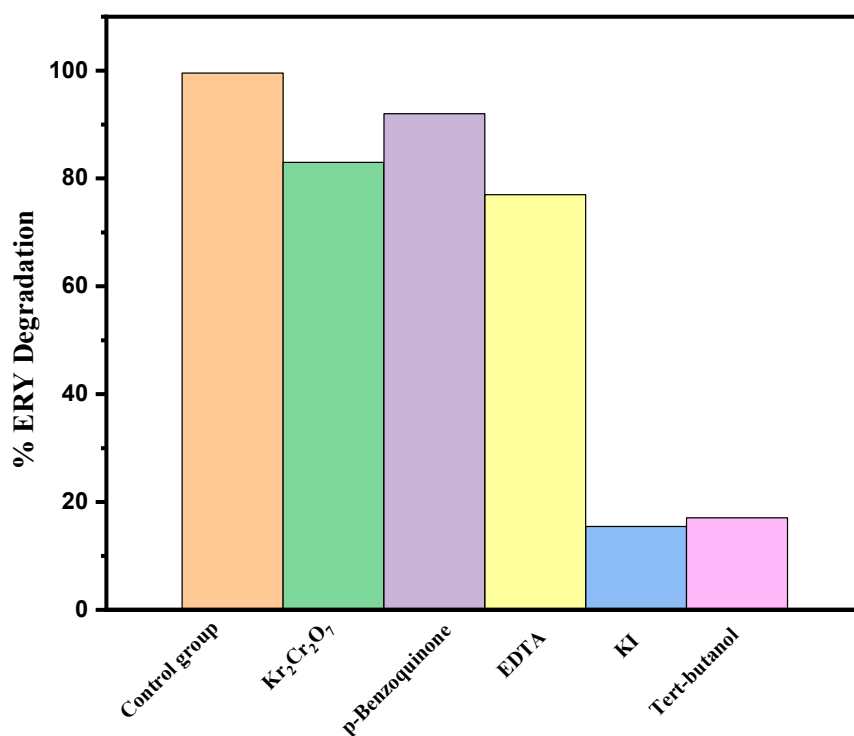

Figure S2. **Radical** scavenger experiment

Table S1. Detailed methodology for ERY analysis using LC/MS/MS

| Instrument       | Thermo Vanquish |
|------------------|-----------------|
| Ion Source Type  | H-ESI           |
| Spray Voltage    | Static          |
| Positive Ion (V) | 3500            |
| Negative Ion (V) | 2500            |

|                             |                                      |
|-----------------------------|--------------------------------------|
| Sheath Gas (Arb)            | 50                                   |
| Aux Gas (Arb)               | 10                                   |
| Sweep Gas (Arb)             | 1                                    |
| Ion Transfer Tube Temp (°C) | 325                                  |
| Vaporizer Temp (°C)         | 350                                  |
| Column                      | Waters Cortects C18 (2.1x100, 1.6um) |
| Column Temp (°C)            | 45                                   |
| Mobile phase A              | 0.1% Fumic acid in Distilled Water   |
| Mobile phase B              | 0.1% Fumic acid in acetonitrile      |
| Flow (ml/min)               | 0.5                                  |
| Retention time (min)        | 3.38                                 |
